# Supplementary material for: Prognostic value of patient‐derived xenograft engraftment in pediatric sarcomas
Source: PubMed Central journal article supplement (PMC8185364; doi:10.1002/cjp2.210), 2021-04-09
Supplement: CJP2-7-338-s001.pdf [file CJP2-7-338-s001.pdf]

## **Prognostic value of patient-derived xenograft engraftment in pediatric sarcomas**

H Castillo-Ecija *et al. J Pathol Clin Res* DOI: 10.1002/cjp2.210

### **Supplementary Material**

Reference numbers refer to the list in the main paper

**Figure S1.** Staining of human cells in six representative cases of xenografts at early and late passages

**Figure S2.** Comparative histology of two PDX derived from the same rhabdomyosarcoma patient at relapse and necropsy

**Figure S3.** Analysis of cell proliferation in human tumor biopsies and their corresponding PDXs

**Figure S4.** Whole genome visualization of the chromosomal profiles of patients with Ewing sarcoma and rhabdomyosarcoma and their matched PDX models

**Table S1.** Clinical data of patients with Ewing sarcoma, osteosarcoma and rhabdomyosarcoma

**Table S2.** Data from patient derived-xenografts (PDX) established from patients with Ewing sarcoma, osteosarcoma and rhabdomyosarcoma

**Table S3.** Clinical information from patients with Ewing sarcoma (N = 31; median age 12.3 years; range 0.52 – 17.9 years)

**Table S4.** Clinical information from patients with osteosarcoma (N = 10; median age 11.1 years; range 5.67 – 14.7 years)

**Table S5.** Clinical information from patients with rhabdomyosarcoma (N = 10; median age 9.7 years; range 4.03 – 15.4 years)

**Table S6.** Engraftment outcomes of patient samples

**Table S7.** Association of technical factors with engraftment

**Table S8.** Association of previous biopsy engraftment with the engraftment of the following biopsy obtained from the same patient

**Table S9.** Association of patient factors with engraftment in patients with Ewing sarcoma

**Table S10.** Clinical data from PDX models included in the efficacy study of irinotecan

**Table S11.** PDX response to treatment with a single cycle of irinotecan

**Table S12.** Comparative response to irinotecan-based treatments of rhabdomyosarcoma patients and their corresponding PDX

**Table S13.** Comparative response to irinotecan treatment and median survival of PDXs at  $F \leq 2$  or  $F \geq 6$  passages

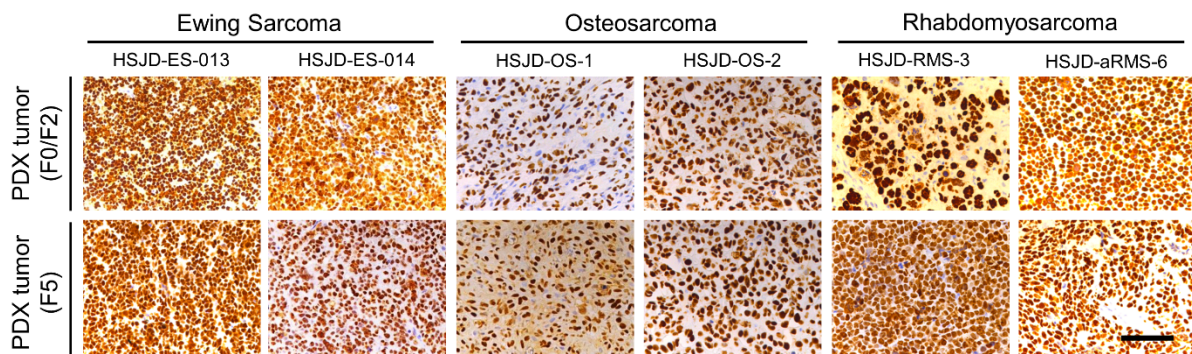

**Figure S1.** Staining of human cells (human nuclei, in brown) in six representative cases of xenografts at early (*F0/F2*) and late passages (*F5*). These representative samples were selected among six Ewing sarcoma, three osteosarcoma and three rhabdomyosarcoma with complete histopathology studies. All images were obtained using a microscope with a 20x objective. Scale bar represents 50  $\mu\text{m}$ .

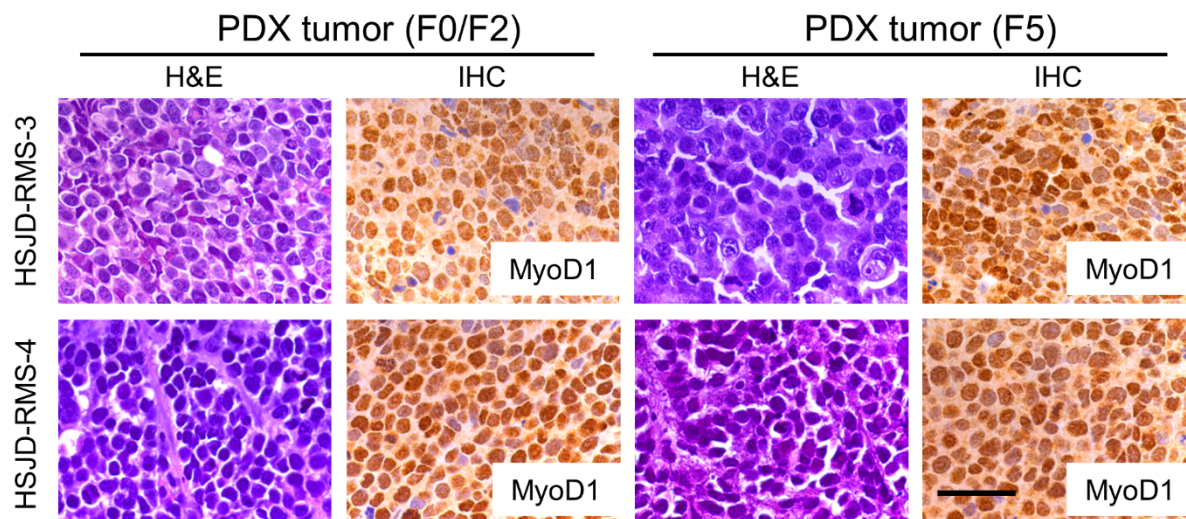

**Figure S2.** Comparative histology (H&E and MyoD1 staining) of two PDX derived from the same rhabdomyosarcoma patient at relapse (HSJD-RMS-3) and necropsy (HSJD-RMS-4). MyoD1 (nuclear) is stained in brown. All images were obtained using a microscope with a 40x objective. Scale bar represents 25  $\mu$ m.

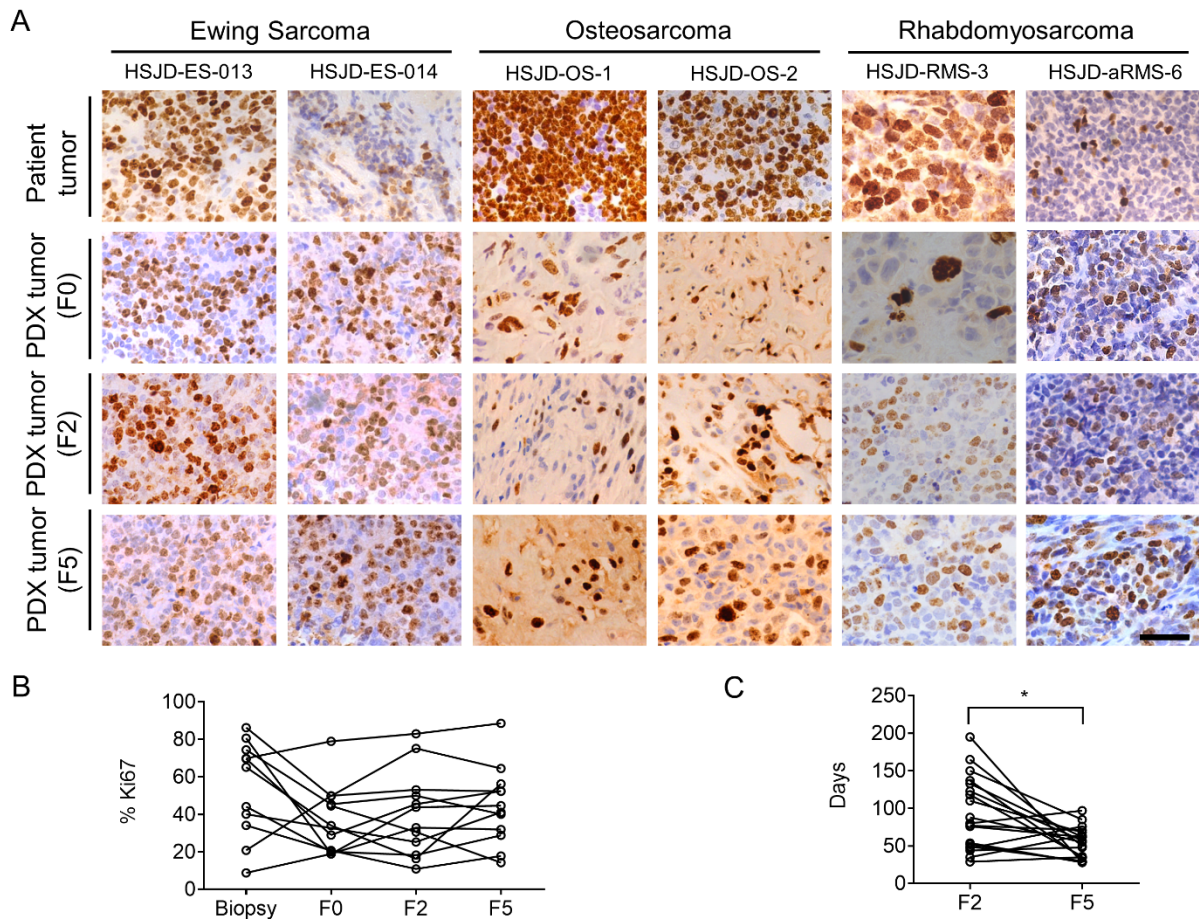

**Figure S3.** Analysis of cell proliferation in human tumor biopsies and their corresponding PDXs. (A) Ki67 histology staining in patient tumor and three PDX generations (*F0*, *F2* and *F5*) in six representative cases. All images were obtained using a microscope with a 40x objective. Scale bar represents 25  $\mu\text{m}$ . (B) Quantification of Ki67 positive cells (%). These samples were selected among six Ewing sarcoma, three osteosarcoma and three rhabdomyosarcoma with complete histopathology studies. Each point represents the mean of ten slides per tumor and generation. (C) Time in days of tumor growth at *F2* and *F5* to achieve 1500  $\text{mm}^3$ . \* $P = 0.0042$ , paired *t* test, *F2* vs *F5*.



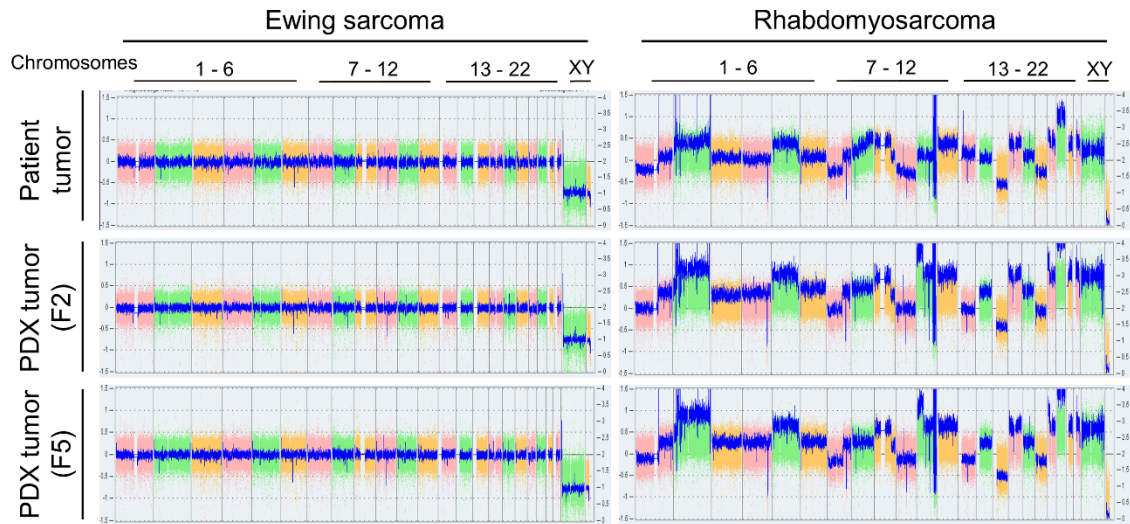

**Figure S4.** Whole genome visualization of the chromosomal profiles of patients with Ewing sarcoma (model named HSJD-ES-012) and rhabdomyosarcoma (HSJD-RMS-4) and their matched PDX models at generations *F2* and *F5*. The log<sub>2</sub> copy number track and the smooth signal indicate the segmental and copy number aberrations observed in the samples. Each column represents a different chromosome.

**Table S1.** Clinical data of patients with Ewing sarcoma, osteosarcoma and rhabdomyosarcoma

| <b>Data type</b>             | <b>Description</b>                   | <b>Entry (example)</b>        |
|------------------------------|--------------------------------------|-------------------------------|
| Patient clinical information | Patient ID                           | ES-009                        |
|                              | Gender                               | Male                          |
|                              | Age                                  | 12.5 years old                |
|                              | Diagnosis                            | Ewing sarcoma                 |
|                              | Relapse, dead or last follow up date | 20/10/2010                    |
|                              | Previous treatment                   | GEIS21                        |
| Tumor information            | Treatment response                   | Complete (RECIST protocol)    |
|                              | Tumor ID                             | B20-01234                     |
|                              | Biopsy date                          | 01/01/2020                    |
|                              | Primary tumor tissue of origin       | Chest wall and ribs           |
|                              | Timing of surgery                    | Relapse                       |
|                              | Tissue histology                     | H&E and IHC panel             |
|                              | Molecular tissue analysis            | Fusion gene <i>EWSR1-FLI1</i> |
|                              | Sample collection method             | Tru-Cut needle                |

**Table S2.** Data from patient derived-xenografts (PDX) established from patients with Ewing sarcoma, osteosarcoma and rhabdomyosarcoma

| <b>Data type</b>        | <b>Description</b>                | <b>Entry (example)</b>                  |
|-------------------------|-----------------------------------|-----------------------------------------|
| Xenograft establishment | PDX ID                            | HSJD-ES-009                             |
|                         | Mouse strain (source)             | NOD-SCID (Envigo)                       |
|                         | Sample conservation               | Freshly excised                         |
|                         | Inoculation type and site         | Subcutaneous; both flanks               |
|                         | Use of Matrigel                   | No                                      |
| Tumor analysis          | Engraftment time                  | 4.2 months                              |
|                         | Tumor characterization technology | Histology and IHC panel                 |
|                         | Anti-human nuclei staining        | Positive                                |
| Model study             | Passage                           | <i>F0</i>                               |
|                         | Treatment 1                       | Irinotecan 10 mg/kg/day; 5-day-on-2-off |
|                         | Response to treatment 1           | CR                                      |

**Table S3.** Clinical information from patients with Ewing sarcoma (N = 31; median age 12.3 years; range 0.52 – 17.9 years)

| <b>Factor</b>                                                | <b>No. of Patients</b> | <b>%</b> |
|--------------------------------------------------------------|------------------------|----------|
| Gender                                                       |                        |          |
| Female                                                       | 8                      | 25.8     |
| Male                                                         | 23                     | 74.2     |
| Fusion gene type                                             |                        |          |
| <i>EWSR1-ERG</i>                                             | 2                      | 6.5      |
| <i>EWSR1-FLI1</i>                                            | 29                     | 93.5     |
| Primary tumor                                                |                        |          |
| Chest wall and ribs                                          | 6                      | 19.4     |
| Limbs                                                        | 12                     | 38.7     |
| Pelvic bones                                                 | 6                      | 19.4     |
| Vertebral spine                                              | 7                      | 22.6     |
| Metastasis at diagnosis                                      |                        |          |
| No                                                           | 23                     | 74.2     |
| Yes                                                          | 8                      | 25.8     |
| Risk stratification of newly diagnosed patients <sup>1</sup> |                        |          |
| Standard                                                     | 7                      | 38.9     |
| High                                                         | 11                     | 61.1     |

<sup>1</sup>Of the 31 patients included in this study, 18 were included at disease diagnosis. For such patients, we applied the risk stratification protocol published in reference [5].



**Table S4.** Clinical information from patients with osteosarcoma (N = 10; median age 11.1 years; range 5.67 – 14.7 years)

| <b>Factor</b>           | <b>No. of Samples</b> | <b>%</b> |
|-------------------------|-----------------------|----------|
| Gender                  |                       |          |
| Female                  | 3                     | 30       |
| Male                    | 7                     | 70       |
| Primary tumor           |                       |          |
| Limbs                   | 10                    | 100      |
| Metastasis at diagnosis |                       |          |
| No                      | 8                     | 80       |
| Yes                     | 2                     | 20       |

**Table S5.** Clinical information from patients with rhabdomyosarcoma (N = 10; median age 9.7 years; range 4.03 – 15.4 years)

| <b>Factor</b>           | <b>No. of Samples</b> | <b>%</b> |
|-------------------------|-----------------------|----------|
| Gender                  |                       |          |
| Female                  | 3                     | 30       |
| Male                    | 7                     | 70       |
| Tumor type              |                       |          |
| Alveolar (aRMS)         | 5                     | 50       |
| Embryonal (eRMS)        | 5                     | 50       |
| Fusion gene type        |                       |          |
| Absent                  | 5                     | 50       |
| <i>PAX3-FKHR</i>        | 4                     | 40       |
| <i>PAX7-FKHR</i>        | 1                     | 10       |
| Primary tumor           |                       |          |
| Chest wall and ribs     | 1                     | 10       |
| Head and neck           | 3                     | 30       |
| Limbs                   | 3                     | 30       |
| Pelvic bones            | 1                     | 10       |
| Urogenital region       | 2                     | 20       |
| Metastasis at diagnosis |                       |          |
| No                      | 6                     | 60       |
| Yes                     | 4                     | 40       |

**Table S6.** Engraftment outcomes of patient samples

| <b>Patient</b> | <b>Disease</b>   | <b>Biopsies attempted</b> | <b>Biopsies engrafted</b> | <b>PDX ID</b>            |
|----------------|------------------|---------------------------|---------------------------|--------------------------|
| 1              | Ewing sarcoma    | 1                         | 1                         | HSJD-ES-004              |
| 2              | Ewing sarcoma    | 1                         | 1                         | HSJD-ES-003              |
| 3              | Osteosarcoma     | 1                         | 0                         | None                     |
| 4              | Ewing sarcoma    | 1                         | 0                         | None                     |
| 5              | Ewing sarcoma    | 1                         | 0                         | None                     |
| 6              | Rhabdomyosarcoma | 2                         | 1                         | HSJD-aRMS-5              |
| 7              | Ewing sarcoma    | 1                         | 0                         | None                     |
| 8              | Rhabdomyosarcoma | 1                         | 1                         | HSJD-aRMS-6              |
| 9              | Ewing sarcoma    | 2                         | 0                         | None                     |
| 10             | Rhabdomyosarcoma | 3                         | 2                         | HSJD-aRMS-1, HSJD-aRMS-2 |
| 11             | Ewing sarcoma    | 1                         | 0                         | None                     |
| 12             | Ewing sarcoma    | 2                         | 0                         | None                     |
| 13             | Ewing sarcoma    | 2                         | 2                         | HSJD-ES-005, HSJD-ES-016 |
| 14             | Rhabdomyosarcoma | 2                         | 1                         | HSJD-aRMS-7              |
| 15             | Ewing sarcoma    | 1                         | 0                         | None                     |
| 16             | Ewing sarcoma    | 2                         | 2                         | HSJD-ES-001, HSJD-ES-007 |
| 17             | Ewing sarcoma    | 3                         | 0                         | None                     |
| 18             | Ewing sarcoma    | 1                         | 0                         | None                     |

|    |                  |   |   |                          |
|----|------------------|---|---|--------------------------|
| 19 | Rhabdomyosarcoma | 1 | 0 | None                     |
| 20 | Osteosarcoma     | 2 | 1 | HSJD-OS-4                |
| 21 | Ewing sarcoma    | 1 | 0 | None                     |
| 22 | Ewing sarcoma    | 1 | 0 | None                     |
| 23 | Ewing sarcoma    | 1 | 0 | None                     |
| 24 | Rhabdomyosarcoma | 1 | 1 | HSJD-aRMS-8              |
| 25 | Ewing sarcoma    | 2 | 2 | HSJD-ES-002, HSJD-ES-006 |
| 26 | Ewing sarcoma    | 1 | 0 | None                     |
| 27 | Ewing sarcoma    | 1 | 0 | None                     |
| 28 | Ewing sarcoma    | 2 | 2 | HSJD-ES-009, HSJD-ES-018 |
| 29 | Osteosarcoma     | 2 | 2 | HSJD-OS-1, HSJD-OS-5     |
| 30 | Rhabdomyosarcoma | 2 | 2 | HSJD-RMS-3, HSJD-RMS-4   |
| 31 | Ewing sarcoma    | 1 | 0 | None                     |
| 32 | Ewing sarcoma    | 1 | 1 | HSJD-ES-015              |
| 33 | Ewing sarcoma    | 1 | 0 | None                     |
| 34 | Ewing sarcoma    | 2 | 2 | HSJD-ES-008, HSJD-ES-012 |
| 35 | Osteosarcoma     | 1 | 0 | None                     |
| 36 | Ewing sarcoma    | 1 | 1 | None                     |
| 37 | Ewing sarcoma    | 2 | 2 | HSJD-ES-013, HSJD-ES-017 |
| 38 | Ewing sarcoma    | 1 | 1 | HSJD-ES-014              |
| 39 | Rhabdomyosarcoma | 1 | 0 | None                     |

|    |                  |   |   |           |
|----|------------------|---|---|-----------|
| 40 | Osteosarcoma     | 1 | 0 | None      |
| 41 | Ewing sarcoma    | 1 | 0 | None      |
| 42 | Osteosarcoma     | 1 | 1 | HSJD-OS-2 |
| 43 | Ewing sarcoma    | 1 | 0 | None      |
| 44 | Osteosarcoma     | 1 | 0 | None      |
| 45 | Osteosarcoma     | 1 | 1 | HSJD-OS-3 |
| 46 | Ewing sarcoma    | 1 | 0 | None      |
| 47 | Osteosarcoma     | 1 | 0 | None      |
| 48 | Osteosarcoma     | 1 | 0 | None      |
| 49 | Rhabdomyosarcoma | 1 | 0 | None      |
| 50 | Rhabdomyosarcoma | 1 | 0 | None      |
| 51 | Ewing sarcoma    | 1 | 0 | None      |

**Table S7.** Association of technical factors with engraftment

| <b>Factor</b>       | <b>No. of Samples</b> | <b>% Engrafted</b> | <b>No. of Engrafted</b> | <b>OR (95% CI)</b> | <b>P</b> |
|---------------------|-----------------------|--------------------|-------------------------|--------------------|----------|
| Sample conservation |                       |                    |                         |                    |          |
| Freshly excised     | 56                    | 44.6               | 25                      |                    |          |
| Cryopreserved       | 12                    | 41.7               | 5                       | 1.28 (0.3 to 6.2)  | 0.76     |
| Use of Matrigel     |                       |                    |                         |                    |          |
| No                  | 41                    | 43.9               | 18                      |                    |          |
| Yes                 | 27                    | 44.4               | 12                      | 1.13 (0.3 to 3.9)  | 0.84     |
| Biopsy method       |                       |                    |                         |                    |          |
| Tru-cut needle      | 32                    | 31.2               | 10                      |                    |          |
| Surgery             | 35                    | 57.1               | 20                      | 4.05 (1-17.3)      | 0.059    |

**Table S8.** Association of previous biopsy engraftment with the engraftment of the following biopsy obtained from the same patient

| <b>Factor</b>                                | <b>No. of Samples</b> | <b>% Engrafted</b> | <b>No. of Engrafted</b> | <b>OR (95% CI)</b> | <b>P</b> |
|----------------------------------------------|-----------------------|--------------------|-------------------------|--------------------|----------|
| PDX already established from previous biopsy |                       |                    |                         |                    |          |
| Yes                                          | 11                    | 82                 | 9                       |                    |          |
| No                                           | 4                     | 25                 | 1                       | 13.5 (1.13 to 18)  | 0.0769   |



**Table S9.** Association of patient factors with engraftment in patients with Ewing sarcoma

| <b>Factor</b>           | <b>No. of Samples</b> | <b>% Engrafted</b> | <b>No. of Engrafted</b> | <b>Odds ratio (95% CI)</b>                                       | <b>P</b> |
|-------------------------|-----------------------|--------------------|-------------------------|------------------------------------------------------------------|----------|
| Age, years              |                       |                    |                         |                                                                  |          |
| < 12                    | 18                    | 22.2               | 4                       |                                                                  |          |
| ≥ 12                    | 23                    | 56.5               | 13                      | 4.33 (0.00 – 748.21)                                             | 0.70     |
| Timing of surgery       |                       |                    |                         |                                                                  |          |
| Diagnosis               | 18                    | 22.2               | 4                       |                                                                  |          |
| Relapse                 | 23                    | 56.5               | 13                      | 4.76 (4.74 to 4.78)                                              | <0.0001  |
| Biopsy origin           |                       |                    |                         |                                                                  |          |
| Limbs                   | 11                    | 36.4               | 4                       |                                                                  |          |
| Head and neck           | 7                     | 71.4               | 5                       | $2.44 \cdot 10^9$ (534.56 – $1.11 \cdot 10^{16}$ ) <sup>a</sup>  |          |
| Chest wall and ribs     | 5                     | 40.0               | 2                       | $2.86$ ( $9.83 \cdot 10^{-5}$ – $8.29 \cdot 10^4$ ) <sup>a</sup> |          |
| Lung or pleura          | 9                     | 55.6               | 5                       | $6.80 \cdot 10^8$ (2081.25 – $2.22 \cdot 10^{14}$ ) <sup>a</sup> |          |
| Pelvic bones            | 3                     | 33.3               | 1                       | $1.20$ ( $4.65 \cdot 10^{-6}$ – $3.10 \cdot 10^5$ ) <sup>a</sup> | 0.52     |
| Muscle                  | 0                     | 0                  | 0                       | *                                                                |          |
| Teste                   | 0                     | 0                  | 0                       | *                                                                |          |
| Vertebral spine         | 6                     | 0                  | 0                       | *                                                                |          |
| Metastasis at diagnosis |                       |                    |                         |                                                                  |          |
| No                      | 29                    | 31.0               | 9                       |                                                                  |          |
| Yes                     | 12                    | 66.7               | 8                       | $6.62 \cdot 10^9$ ( $6.59 \cdot 10^4$ – $6.65 \cdot 10^{14}$ )   | 0.00012  |

\*Excluded from statistical analysis of biopsy origin due to lack of an event in No. of engrafted or in No. of nonengrafted samples.

<sup>a</sup>Compared to limbs.

**Table S10.** Clinical data from PDX models included in the efficacy study of irinotecan

| <b>PDX model ID</b> | <b>Disease stage</b> | <b>Age (years) (g)<sup>a</sup></b> | <b>Primary</b> | <b>Metastasis at diagnosis</b>              | <b>Previous treatment</b>                                                 | <b>Biopsy location</b> | <b>Fusion gene type</b>             |
|---------------------|----------------------|------------------------------------|----------------|---------------------------------------------|---------------------------------------------------------------------------|------------------------|-------------------------------------|
| HSJD-ES-001         | Relapse              | 17.8 (M)                           | Scapula        | Lung, skull, ribs, sternum, bone marrow     | G/D <sup>b</sup> , I/T <sup>c</sup> , RT <sup>d</sup> , HIFU <sup>e</sup> | Scapula                | <i>EWSR1-FLI1</i> fusion (type II)  |
| HSJD-ES-002         | Diagnosis            | 12.2 (M)                           | Fibula         | None                                        | None                                                                      | Fibula                 | <i>EWSR1-FLI1</i> fusion (ex10-ex5) |
| HSJD-ES-004         | Relapse              | 18 (M)                             | Mediastinum    | None                                        | SEHOP 2001 <sup>f</sup>                                                   | Mediastinum            | <i>EWSR1-FLI1</i> fusion (type I)   |
| HSJD-ES-006         | Relapse              | 13.5 (M)                           | Fibula         | Pleura, lung                                | GEIS21 (standard risk) <sup>g</sup>                                       | Pleura                 | <i>EWSR1-FLI1</i> fusion (ex10-ex5) |
| HSJD-ES-008         | Diagnosis            | 13 (M)                             | Humerus        | Lung, pleura, lymph node, bone, bone marrow | None                                                                      | Humerus                | <i>EWSR1-FLI1</i> fusion (type I)   |
| HSJD-ES-009         | Relapse              | 10.7 (M)                           | Chest          | None                                        | GEIS 21 (standard risk) <sup>g</sup>                                      | Skull                  | <i>EWSR1-FLI1</i> fusion (type II)  |

|             |           |          |         |       |                                                                             |           |                                      |
|-------------|-----------|----------|---------|-------|-----------------------------------------------------------------------------|-----------|--------------------------------------|
| HSJD-ES-011 | Relapse   | 13.9 (F) | Ribs    | None  | SEHOP<br>2001 <sup>f</sup> , VIT <sup>h</sup>                               | Pleura    | <i>EWSR1-FLI1</i><br>fusion (type I) |
| HSJD-ES-012 | Relapse   | 14.7 (M) | Humerus | Skull | GEIS21<br>(high risk) <sup>i</sup> ;<br>I/T <sup>c</sup> ; G/D <sup>b</sup> | Skull     | <i>EWSR1-FLI1</i><br>fusion (type I) |
| HSJD-ES-013 | Relapse   | 18.6 (M) | Pleura  | None  | GEIS21<br>(high risk) <sup>i</sup>                                          | Trapezius | <i>EWSR1-FLI1</i><br>fusion (type I) |
| HSJD-ES-015 | Relapse   | 18.3 (M) | Tibia   | None  | GEIS21<br>(standard<br>risk) <sup>g</sup>                                   | Lung      | <i>EWSR1-FLI1</i><br>fusion (type I) |
| HSJD-ES-017 | Diagnosis | 17.9 (M) | Pleura  | None  | None                                                                        | Pleura    | <i>EWSR1-FLI1</i><br>fusion (type I) |
| HSJD-aRMS-1 | Relapse   | 12.3 (M) | Ribs    | None  | MSKCC <sup>j</sup>                                                          | Ribs      | <i>PAX3-FKHR</i><br>fusion           |
| HSJD-aRMS-2 | Relapse   | 14 (M)   | Ribs    | None  | MSKCC <sup>j</sup>                                                          | Pleura    | <i>PAX3-FKHR</i><br>fusion           |

|             |           |          |                 |                                                      |                                |                 |                            |
|-------------|-----------|----------|-----------------|------------------------------------------------------|--------------------------------|-----------------|----------------------------|
| HSJD-RMS-3  | Relapse   | 8.3 (F)  | Maxillary bone  | Parotid gland,<br>maxillary sinus,<br>orbital bone   | MSKCC <sup>j</sup>             | Lymph node      | Absent                     |
| HSJD-aRMS-7 | Diagnosis | 11.1 (M) | Thigh           | None                                                 | None                           | Thigh           | <i>PAX7-FKHR</i><br>fusion |
| HSJD-RMS-9  | Diagnosis | 1.4 (M)  | Retroperitoneum | None                                                 | None                           | Retroperitoneum | Absent                     |
| HSJD-RMS-11 | Diagnosis | 12.3 (M) | Perianal        | Mediastinum, lung,<br>retroperitoneum,<br>lymph node | None                           | Perianal        | Absent                     |
| HSJD-OS-1   | Relapse   | 15.5 (M) | Tibia           | None                                                 | SEHOP-<br>SO-2010 <sup>k</sup> | Lung            | -                          |
| HSJD-OS-4   | Relapse   | 15.4 (M) | Femur           | None                                                 | SEHOP-<br>SO-2001 <sup>l</sup> | Thigh           | -                          |

<sup>a</sup>g: gender. M: male; F: female.

<sup>b</sup>G/D: clinical protocol including gemcitabine and docetaxel as in reference [49].

<sup>c</sup>I/T: clinical protocol including irinotecan and temozolomide as in reference [50].

<sup>d</sup>RT: radiation therapy.

<sup>e</sup>HIFU: high intensity focused ultrasound.

<sup>f</sup>SEHOP 2001: clinical protocol including six cycles of VIDE chemotherapy (day 1 vincristine followed by day 1 to 3 with doxorubicin, ifosfamide and etoposide) as in reference [51].

<sup>g</sup>GEIS21 (standard risk): clinical protocol including five cycles of mP6 chemotherapy (cycles 1, 2 and 4 with cyclophosphamide, doxorubicin and vincristine; and cycles 3 and 5 with ifosfamide and etoposide); surgery; radiation therapy as in reference [5].

<sup>h</sup>VIT: clinical protocol including vincristine, irinotecan and temozolomide as in reference [52].

<sup>i</sup>GEIS21 (high risk): clinical protocol including gemcitabine/docetaxel (G/D) window phase, followed by five cycles of mP6 chemotherapy; surgery; radiation therapy; followed by G/D maintenance therapy as in reference [5].

<sup>j</sup>MSKCC: clinical protocol at Memorial Sloan-Kettering Cancer Center, including two cycles of carboplatin and irinotecan window phase, followed by three cycles of vincristine, doxorubicin and cyclophosphamide (VAdriaC) induction therapy; radiation therapy and surgery as in reference [53].

<sup>k</sup>SEHOP-SO-2010: clinical protocol including two cycles of high-dose ifosfamide, methotrexate, cisplatin and doxorubicin followed by surgery. After surgery, liposomal-muramyl tripeptide phosphatidyl-ethanolamine (MEPACT) followed by two cycles of doxorubicin and three cycles of high-dose ifosfamide, methotrexate and cisplatin as in reference [54].

<sup>l</sup>SEHOP-SO-2001: clinical protocol including two cycles of high-dose ifosfamide, methotrexate, cisplatin and doxorubicin followed by surgery. Post-surgery treatment consisted in two cycles of doxorubicin and three cycles of high-dose ifosfamide, methotrexate and cisplatin as in reference [55].

**Table S11.** PDX response to treatment with a single cycle of irinotecan

| <b>PDX model</b>         | <b>Generation</b> | <b>Treatment</b> | <b>N<br/>(tumors)</b> | <b>CR (%)</b> | <b>PR (%)</b> | <b>SD (%)</b> | <b>PD (%)</b> |
|--------------------------|-------------------|------------------|-----------------------|---------------|---------------|---------------|---------------|
| HSJD-ES-001              | <i>F6</i>         | Control          | 5                     | 0             | 0             | 0             | 100           |
|                          |                   | Irinotecan       | 6                     | 100           | 0             | 0             | 0             |
| HSJD-ES-002              | <i>F4</i>         | Control          | 8                     | 0             | 0             | 0             | 100           |
|                          |                   | Irinotecan       | 6                     | 100           | 0             | 0             | 0             |
| HSJD-ES-004              | <i>F4</i>         | Control          | 6                     | 0             | 0             | 0             | 100           |
|                          |                   | Irinotecan       | 7                     | 100           | 0             | 0             | 0             |
| HSJD-ES-006              | <i>F3</i>         | Control          | 6                     | 0             | 0             | 0             | 100           |
|                          |                   | Irinotecan       | 6                     | 100           | 0             | 0             | 0             |
| HSJD-ES-008              | <i>F3</i>         | Control          | 6                     | 0             | 0             | 0             | 100           |
|                          |                   | Irinotecan       | 6                     | 100           | 0             | 0             | 0             |
| HSJD-ES-011              | <i>F6</i>         | Control          | 3                     | 0             | 0             | 0             | 100           |
|                          |                   | Irinotecan       | 7                     | 0             | 0             | 100           | 0             |
| HSJD-ES-012              | <i>F4</i>         | Control          | 4                     | 0             | 0             | 0             | 100           |
|                          |                   | Irinotecan       | 5                     | 0             | 0             | 100           | 0             |
| HSJD-ES-013              | <i>F4</i>         | Control          | 5                     | 0             | 0             | 0             | 100           |
|                          |                   | Irinotecan       | 5                     | 100           | 0             | 0             | 0             |
| HSJD-ES-015              | <i>F4</i>         | Control          | 7                     | 0             | 0             | 0             | 100           |
|                          |                   | Irinotecan       | 7                     | 0             | 28            | 72            | 0             |
| HSJD-aRMS-1              | <i>F10</i>        | Control          | 7                     | 0             | 0             | 0             | 100           |
|                          |                   | Irinotecan       | 7                     | 14            | 72            | 14            | 0             |
| HSJD-RMS-3               | <i>F11</i>        | Control          | 6                     | 0             | 0             | 0             | 100           |
|                          |                   | Irinotecan       | 7                     | 100           | 0             | 0             | 0             |
| HSJD-aRMS-7              | <i>F5</i>         | Control          | 4                     | 0             | 0             | 0             | 100           |
|                          |                   | Irinotecan       | 3                     | 0             | 100           | 0             | 0             |
| HSJD-RMS-9 <sup>a</sup>  | <i>F3</i>         | Control          | 7                     | 0             | 0             | 0             | 100           |
|                          |                   | Irinotecan       | 7                     | 100           | 0             | 0             | 0             |
| HSJD-RMS-11 <sup>a</sup> | <i>F2</i>         | Control          | 5                     | 0             | 0             | 0             | 100           |
|                          |                   | Irinotecan       | 5                     | 100           | 0             | 0             | 0             |
| HSJD-OS-1                | <i>F4</i>         | Control          | 5                     | 0             | 0             | 0             | 100           |
|                          |                   | Irinotecan       | 9                     | 11            | 33            | 56            | 0             |
| HSJD-OS-4                | <i>F1</i>         | Control          | 4                     | 0             | 0             | 0             | 100           |
|                          |                   | Irinotecan       | 3                     | 0             | 0             | 100           | 0             |

<sup>a</sup>Model obtained from patient not included in the PDX engraftment study cohort

**Table S12.** Comparative response to irinotecan-based treatments of rhabdomyosarcoma patients and their corresponding PDX

| <b>PDX model ID</b> | <b>Patient Treatment</b>    | <b>Clinical response</b> | <b>PDX response to irinotecan</b> |
|---------------------|-----------------------------|--------------------------|-----------------------------------|
| HSJD-aRMS-7         | Irinotecan plus carboplatin | PR                       | PR                                |
| HSJD-RMS-9          | Irinotecan plus vincristine | SD                       | CR                                |
| HSJD-aRMS-10        | Irinotecan plus carboplatin | PR                       | PR                                |
| HSJD-RMS-11         | Irinotecan plus carboplatin | CR                       | CR                                |



**Table S13.** Comparative response to irinotecan treatment and median survival of PDXs at  $F \leq 2$  or  $F \geq 6$  passages

| PDX model   | $F(x)$ | Treatment  | N (tumors) | CR (%) | PR (%) | SD (%) | PD (%) | Median survival (days) | $P^a$   |
|-------------|--------|------------|------------|--------|--------|--------|--------|------------------------|---------|
| HSJD-ES-009 | $F2$   | Control    | 6          | 0      | 0      | 0      | 100    | 16                     | 0.0008  |
|             |        | Irinotecan | 7          | 14     | 14     | 72     | 0      | >30 <sup>b</sup>       |         |
|             | $F6$   | Control    | 10         | 0      | 0      | 0      | 100    | 21                     |         |
|             |        | Irinotecan | 9          | 11     | 22     | 56     | 11     | 44                     |         |
| HSJD-ES-017 | $F1$   | Control    | 8          | 0      | 0      | 0      | 100    | 51.5                   | 0.00014 |
|             |        | Irinotecan | 8          | 50     | 13     | 37     | 0      | 84                     |         |
|             | $F8$   | Control    | 5          | 0      | 0      | 0      | 100    | 56                     |         |
|             |        | Irinotecan | 7          | 0      | 72     | 28     | 0      | 88                     |         |
| HSJD-aRMS-2 | $F2$   | Control    | 3          | 0      | 0      | 0      | 100    | 48                     | 0.0246  |
|             |        | Irinotecan | 3          | 100    | 0      | 0      | 0      | 86                     |         |
|             | $F10$  | Control    | 6          | 0      | 0      | 0      | 100    | 31                     |         |
|             |        | Irinotecan | 6          | 33     | 67     | 0      | 0      | 88.5                   |         |

<sup>a</sup> $P$  value, compared to control.

<sup>b</sup>This study was ceased at day 30.
